# Supplementary material for: An ABA triblock containing a central soft block of poly[2,5-di(n-hexogycarbonyl)styrene] and outer hard block of poly(4-vinylpyridine): synthesis, phase behavior and mechanical enhancement
Source: Royal Society of Chemistry journal article supplement (doi:10.1039/c4ra01652a), 2014-01-01
Supplement: c4ra01652a1.pdf [file c4ra01652a1.pdf]

Electronic Supplementary Information for

**An ABA triblock containing a central soft block of poly[2,5-di(*n*-hexogycarbonyl)styrene] and outer hard block of poly(4-vinylpyridine): synthesis, phase behavior and mechanical enhancement**

Xin Liu,<sup>†</sup> Rui-Ying Zhao,<sup>†</sup> Ti-Peng Zhao,<sup>‡</sup> Chen-Yang Liu,<sup>‡</sup> Shuang Yang<sup>†,\*</sup> and Er-Qiang Chen<sup>†,\*</sup>

<sup>†</sup> *Beijing National Laboratory for Molecular Sciences, Key Laboratory of Polymer Chemistry and Physics of the Ministry of Education, College of Chemistry and Molecular Engineering, Peking University, Beijing 100871, China. E-mail: shuangyang@pku.edu.cn; eqchen@pku.edu.cn.*

<sup>‡</sup> *Beijing National Laboratory for Molecular Sciences, CAS Key Laboratory of Engineering Plastics, Joint Laboratory of Polymer Science and Materials, Institute of Chemistry, The Chinese Academy of Sciences, Beijing 100190, China*

**Synthesis of monomer 2,5-di(*n*-hexogycarbonylstyrene) (HCS)**

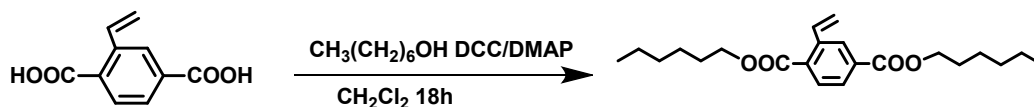

**Scheme S1** Synthetic route of HCS

A 500 mL round bottom flask was charged with a solution of *n*-hexanol (6.6 g, 63 mmol) in 250 mL of CH<sub>2</sub>Cl<sub>2</sub>. To the solution under stirring, vinyl terephthalic acid (5.8 g, 30 mmol), dimethylaminopyridine (DMAP, 0.75 g, 6 mmol) was added followed by DCC (12.6 g, 60 mmol) at room temperature. The solution immediately turned cloudy with white precipitates. After stirring at room temperature overnight, the mixture was filtered and the solution was evaporated. A purified product was easily obtained by passing through a silica gel column. Yield: 60%. <sup>1</sup>H NMR (CDCl<sub>3</sub>, 400

MHz):  $\delta = 7.9\text{--}8.30$  (s, 3H, in phenyl ring),  $\delta = 7.35\text{--}7.50$  (q, H,  $-\text{CH}=\text{}$ ),  $\delta = 5.70\text{--}5.80$  (d, H,  $-\text{CH}=\text{}$ ),  $\delta = 5.35\text{--}5.50$  (d, H,  $-\text{CH}=\text{}$ ),  $\delta = 4.25\text{--}4.40$  (m, 4H,  $-\text{OCH}_2\text{--}$ ),  $\delta = 1.30\text{--}1.90$  (m, 16H,  $-\text{CH}_2\text{--}$ ),  $\delta = 0.80\text{--}1.00$  (m, 6H,  $-\text{CH}_3$ ). Anal. Calcd.  $\text{C}_{22}\text{H}_{32}\text{O}_4$  C: 73.35 H: 9.05 M/Z=360

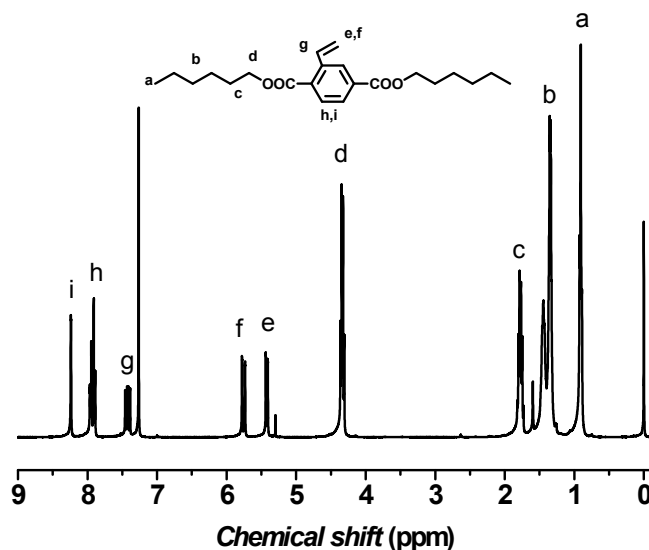

**Fig. SI-1**  $^1\text{H}$  NMR spectrum of 2,5-di(*n*-hexoxycarbonyl)styrene (HCS) monomer (Sample in  $\text{CDCl}_3$ , 400 MHz).

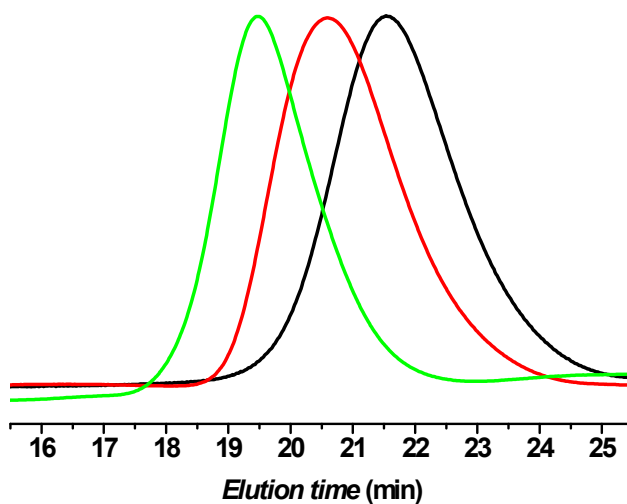

**Fig. SI-2** GPC traces of difunctional macroinitiator Cl-PHCS-Cl. From right to left, the traces correspond to the samples with the  $M_{n, \text{GPC}}$  of 11600, 18000, and 33200  $\text{g mol}^{-1}$  calibrated with polystyrene standards.

**Table SI-1** Molecular weight and polydispersity of difunctional macroinitiator Cl-PHCS-Cl

| Sample code <sup>a</sup> | Conversion | $M_{n, \text{GPC}}$<br>(g mol <sup>-1</sup> ) | $M_{w, \text{GPC}}$<br>(g mol <sup>-1</sup> ) | PDI  | $M_{n, \text{LS-GPC}}$<br>(g/mol) |
|--------------------------|------------|-----------------------------------------------|-----------------------------------------------|------|-----------------------------------|
| PHCS <sub>51</sub>       | 38%        | 11600                                         | 14800                                         | 1.28 | 18400                             |
| PHCS <sub>77</sub>       | 40%        | 18000                                         | 23200                                         | 1.29 | 27600                             |
| PHCS <sub>123</sub>      | 45%        | 31800                                         | 39400                                         | 1.24 | 44500                             |
| PHCS <sub>130</sub>      | 45%        | 33200                                         | 41500                                         | 1.25 | 46900                             |
| PHCS <sub>157</sub>      | 35%        | 35400                                         | 43900                                         | 1.24 | 56600                             |

<sup>a</sup> Sample code PHCS<sub>X</sub>, where subscript X is the degree of polymerization calculated based on the  $M_n$  measured by LS-GPC.

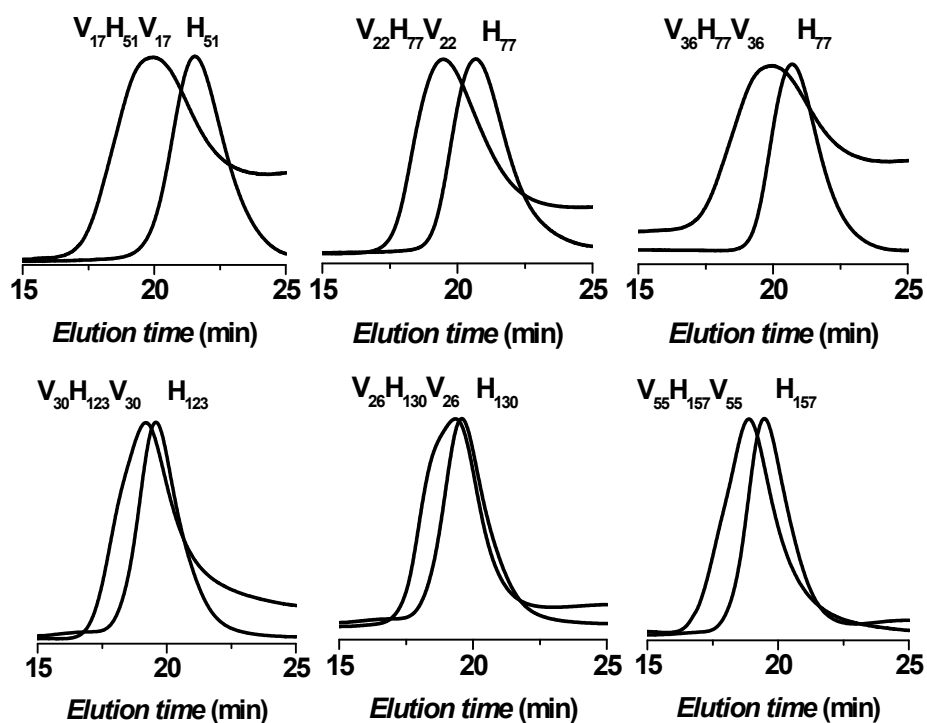

**Fig. SI-3** GPC traces of triblocks of P4VP-*b*-PHCS-*b*-P4VP (V<sub>X</sub>H<sub>Y</sub>V<sub>X</sub>) and the corresponding macroinitiator Cl-PHCS-Cl. THF was used as the eluent at a flow rate of 1.0 ml min<sup>-1</sup>.

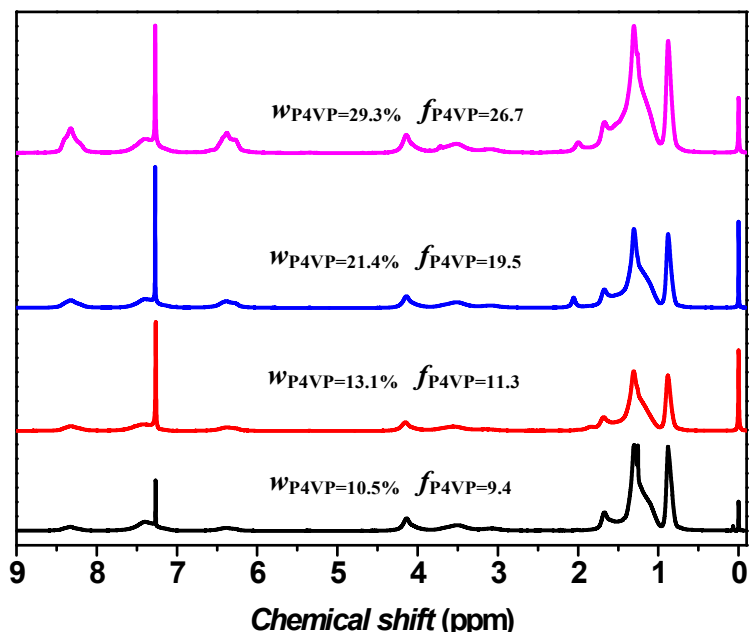

**Fig. SI-4**  $^1\text{H}$  NMR spectra of the P4VP-*b*-PHCS-*b*-P4VP triblock copolymers with various P4VP contents. (samples in  $\text{CDCl}_3$ , 400 MHz).

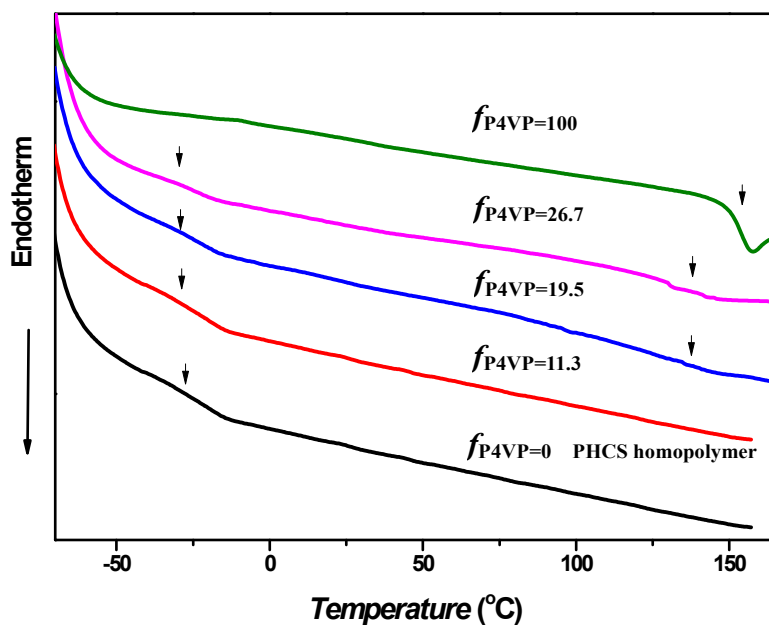

**Fig. SI-5** DSC curves of the triblock copolymers with variable  $f_{\text{P4VP}}$  recorded during the second heating scan at a rate of  $40\text{ }^\circ\text{C min}^{-1}$ .

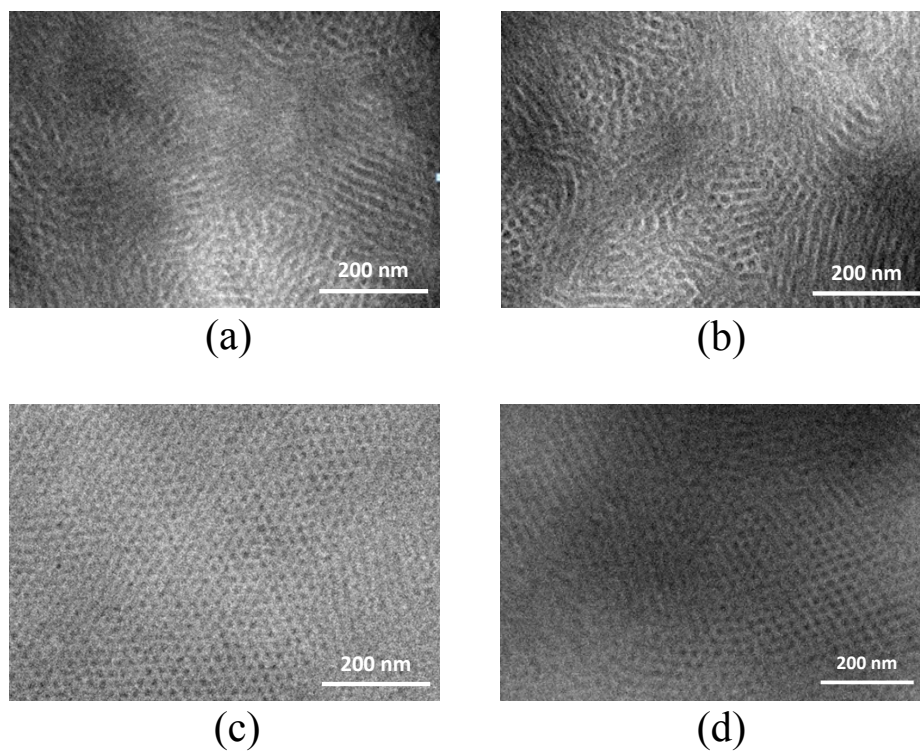

**Fig. SI-6** TEM image of  $V_{36}H_{77}V_{36}$  (a, b) and  $V_{30}H_{123}V_{30}$  (c, d).

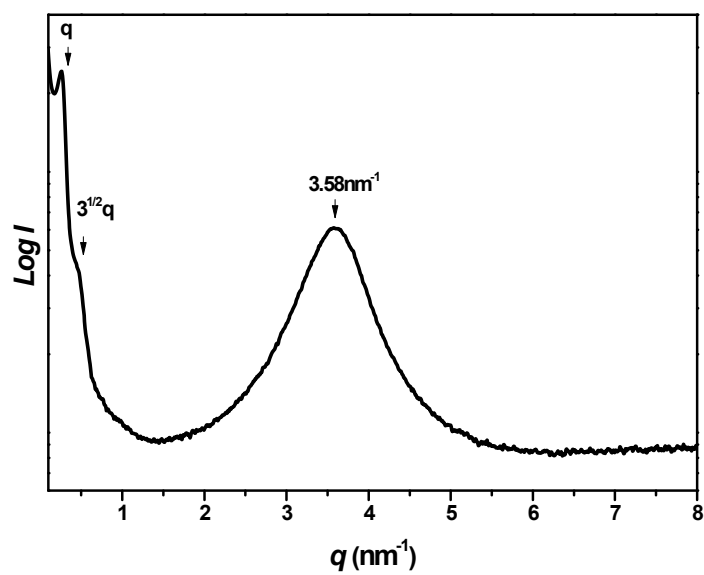

**Fig. SI-7** XRD profile of a typical triblock copolymer of  $V_{30}H_{123}V_{30}$  recorded at 160 °C.

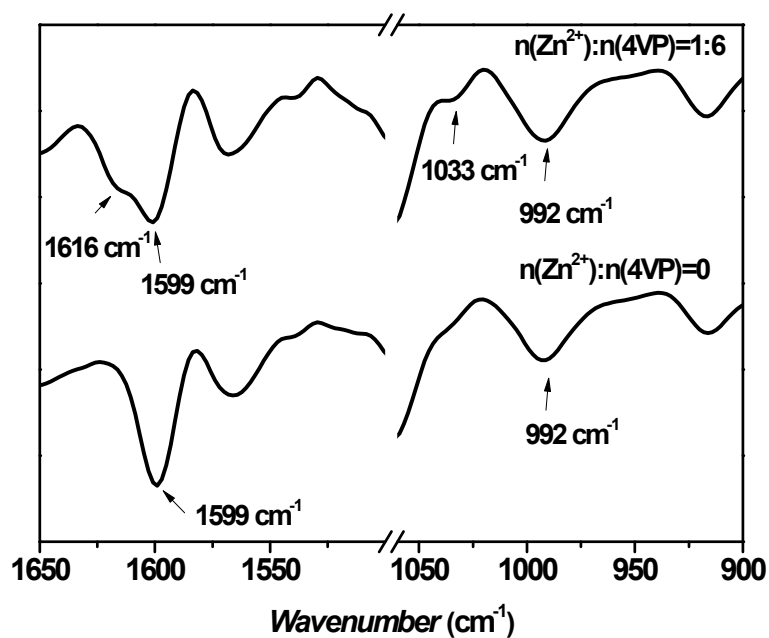

**Fig. SI-8** FTIR spectra recorded in the region 1630-1500  $\text{cm}^{-1}$  and 1060-900  $\text{cm}^{-1}$  for the pure triblock  $\text{V}_{30}\text{H}_{123}\text{V}_{30}$  and the triblock complexed with zinc perchlorate.  $n(\text{Zn}^{2+}):n(4\text{VP})$  is the molar ratio of  $\text{Zn}^{2+}$  to the repeating unit of 4VP.
